# Supplementary material
Source: PubMed Central journal article supplement (PMC2941557)
Supplement: NIHMS198885-supplement-supplement_1.pdf [file NIHMS198885-supplement-supplement_1.pdf]

## Supplemental Material

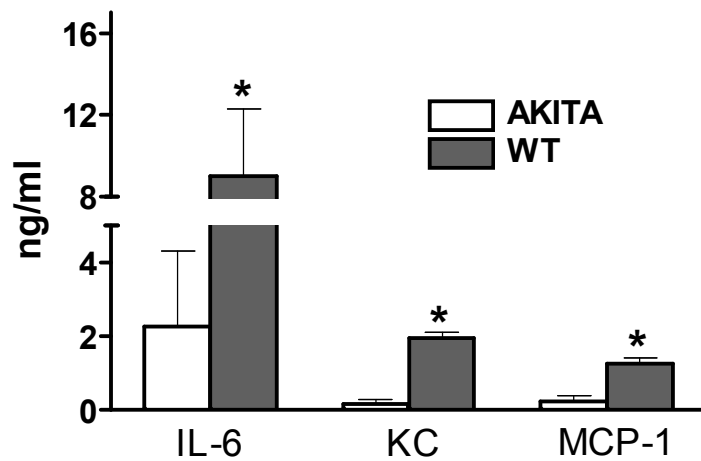

**FIG. 1- Cytokine levels in peritoneal fluid at 4h post-zymosan injection.** AKITA and WT mice were injected intraperitoneally with zymosan A solution (1mg/ml in PBS, Sigma-Aldrich) and the concentration of selected cytokines was measured 4h later in the peritoneal lavage fluid by multiplex bead immunoassay (see reference # 6 in main manuscript). The nonpaired two-tailed Student's *t* test was used to define statistical significance at. n=5-6 mice/group. Data are expressed as mean±SD. \**P* < 0.05 between WT and AKITA for each cytokine.
